# Supplementary material
Source: publisher site journal article supplement (https://www.dovepress.com/article/217866)

**Supplementary Results**

To rule out alternative explanations for the findings reported in the main text, or to shed additional light on our analyses, we conducted various supplemental analyses, detailed below.

Difference Score: Simple Effects

We provide further clarity on the interaction for pain perception ratings, operationalized as a difference score. The interaction between participant race and patient race was not significant *F*(1, 167) = 1.78, *p* = 0.184, ηp2 = 0.011. However, the pattern of results suggests that the main effect of patient race was primarily driven by Latinx-American participants, who ascribed Latinx-American patients with more pain (*M* = 0.26, *SE* = 0.10) than did White-American participants (*M* = -0.05, *SE* = 0.09), *t*(167) = 2.42, *p* = 0.017, *d* = 0.37. Latinx-American (*M* = 0.00, *SE* = 0.09) and White-American (*M* = -0.12, *SE* = 0.09) participant perceivers did not differ in their perception of White patient pain, *t*(167) = 0.90, *p* = 0.369, *d* = 0.14.

Correspondingly, within participant race group, Latinx-American participants also perceived more pain among Latinx-American patients than in White-American patients, *t*(83) = 2.41, *p* = 0.018, *d* = 0.26. White-American participants did not differ in their perceptions of pain for Latinx-American patients and White-American patients, *t*(84) = 0.70, *p* = 0.486, *d* = 0.08. Taken together, Latinx-American participants demonstrated heightened ascriptions of pain for Latinx-American patients, relative to White Americans; participant groups did not differ in their ascriptions of pain for White-American patients.

Categorical Relative Score

The primary dependent variable to assess pain perception in the present study was a difference score [Participant Rating - Vignette Patient Rating]. As there were ten vignettes (5 Latinx, 5 White), composite scores for each patient race were calculated by averaging each set of 5 for each respective patient race. However, a limitation to this operationalization is that an extreme score on one vignette (or a bias toward a certain injury location or type) could draw or drive the average. For instance, if a participant assumed a patient felt much less pain in a single vignette (vignette patient said 10, but participant perceived they felt a 0, that would yield a difference score of -10 for that vignette), but in all other vignettes the participant assumed the patient felt *more* pain (+1 for each), that participant would still have a negative difference score overall.

Therefore, to minimize the impact of any single vignette on participants’ responses and skewing the composite results**, we also coded participant relative pain perception ratings as a categorical variable** (-1 = Participant Rating < Patient Rating, 0 = Participant Rating equal to Patient Rating, +1 = Participant Rating > Patient Rating). Thus, in this scoring method, a participant’s rating for each vignette is given equal weight when determining the average score. As we did with the difference scores, we then average the categorical scores for each vignette to form composite averages (i.e., continuous variables ranging between -1 to +1) for all Latinx-American vignette patients and all White-American vignette patients separately. These scores thus reflect the overall pattern of over-/under- perceiving of pain for each participant.

*Categorical Relative Score Results*

Coded as a categorical relative score, results again revealed a significant main effect of participant race, *F*(1, 167) = 5.14, *p* = 0.025. Latinx-Americans participants perceived patients to be in more pain (*M* = 0.08, *SE* = 0.03), relative to White-American participants (*M* = -0.02, *SE* = 0.03). When examining only the first two trials, the main effect of participant race held, *F*(1, 167) = 7.91, *p =* 0.006. Latinx-American participants (*M* = -0.02, *SE* = 0.04) still perceived more pain in the vignettes relative to White-American participants (*M* = -0.17, *S*E = 0.04).

The overall pattern remained similar, but there was no significant effect of patient race, when coded as a categorical relative score (*F* [1, 167] = 2.72, *p* = 0.101; Latinx-American vignette patients: *M* = 0.05, *SE* = 0.03, White-American vignette patients: *M* = 0.00, *SE* = 0.03). The main effect was also not significant when only looking at the first two trials, *F*(1, 167) = 1.08, *p* = 0.300.

The interaction between participant race and patient race was not significant, *F*(1, 167) = 1.09, *p* = 0.299. However, the pattern of results suggests that the main effect of patient race was primarily driven by Latinx-American participants, who ascribed Latinx-American patients with more pain (*M* = 0.12, *SE* = 0.04) than did White-American participants (*M* = -.01, SE = 0.04), *t*(167) = 2.40, *p* = 0.017. Latinx-American (*M* = 0.04, *SE* = 0.04) and White-American (*M* = -0.03, *SE* = 0.04) participant perceivers did not differ in their perception of White patient pain, *t*(167) = 1.27, *p* = 0.206. Correspondingly, within participant race group, Latinx-American participants also perceived more pain among Latinx-American patients than in White-American patients, *t*(83) *=* 1.84, *p* = 0.070. White-American participants did not differ in their perceptions of pain for Latinx-American patients and White-American patients, *t*(84) = 0.45, *p =* 0.656.

*Categorical Relative Score Discussion*

The results using this alternate scoring method lend further credence to our primary results (i.e., the Difference Score). For the difference score, we found a significant main effect of participant race, such that Latinx-American participants ascribed more pain to vignette patients relative to White-American participants; as well as a main effect of patient race, such that Latinx patients were ascribed more pain relative to White patients. The direction of the main effect of vignette patient race was unexpected, in contrast to existing clinical and epidemiological literature, and was also not present when only looking at the first two trials.

Lending credence to these results, when coded as a categorical relative score, the main effect of participant race held (and also held consistent when only looking at the first two trials), and the main effect of patient race became non-significant. This provides evidence that the main effect of participant race was not merely driven by a single vignette or injury type. Interestingly, the unexpected main effect of patient race for the variable coded as a difference score became non-significant when coded as a categorical relative score, and was also not present when examining the first two trials. Because the categorical relative score equalizes all responses in the same direction (e.g., thinking a patient’s pain is three points higher than they report will be coded the same as thinking a patient’s pain is one point higher than they report), this suggests that the main effect of vignette patient race may be driven by the extremity of pain perceived among Latinx-American patients relative to White-American patients.

Taken together, the finding that holds across all operationalizations of the primary dependent variable is the main effect of participant race.

Exploratory Analyses with Full Sample

Although the primary comparison was between Latinx-Americans and White-Americans, we did not use participant race as an exclusion criterion for participation. Therefore, we conducted additional analyses including participants across races. Specifically, we explored a comparison between all participants of color and White-American participants.

Exploratory Analyses with Full Sample: Results

Accordingly, we conducted a 2 (Vignette Patient Race: Latinx-American, White-American) by 2 (Participant Race: Non-White-American, White-American) between-subjects ANOVA. Similar to our primary findings, there was no main effect of patient race (difference score: *F*[1, 197] = 2.36,  *p* = 0.126; categorical relative score: *F*[1, 197] = 0.30, *p* = 0.299), and no significant interaction between patient race and participant race (difference score: *F*[1, 197] = 0.35, *p* = 0.553; categorical relative score: *F*[1, 197] = 0.17, *p* = 0.678). However, the significant main effect of participant race remained (difference score: *F*[1, 197] = 5.76, *p =* 0.017; categorical relative score: *F*[1, 197] = 7.28, *p* = 0.008), such that non-White participants ascribed patients more pain overall (difference score: *M* = 0.16, *SE* = 0.07; categorical relative score: *M* = 0.09, *SE* = 0.03), relative to White-American participants (difference score: *M* = -0.08, *SE* = 0.08; *M* = 0.02, *SE* = 0.03).

Across this larger sample, we conducted an ANOVA with patient race (Latinx-American, White-American) as a within-subjects factor. Results showed no main effect of patient race, (difference score: *F*[1, 198] = 2.71, *p* = 0.102; categorical relative score: *F*[1, 198] = 1.24, *p* = 0.266).

Exploratory Analyses of Participant Sex Differences

Prior work has suggested sex differences in the perception of other people’s pain. Furthermore, as detailed in the manuscript, all vignettes featured male patients, but our sample consisted of both female and male participants. Therefore, we conducted additional exploratory analyses including participant sex as a covariate in the model, to examine how results covaried as a function of participant sex.

*Sex Differences Results*

***Pain Perception****.* When participant sex was included as a covariate, the *main effect of participant race* became marginal, but the pattern remained the same (difference score: *F*[1, 166] = 2.68, *p* = 0.103; categorical relative score: *F*[1, 166] = 3.62, *p* = 0.059).

The *main effect of vignette patient race* remained non-significant (difference score: *F*[1, 166] = 0.05, *p* = 0.828; categorical relative score: *F*[1, 166] = 0.00, *p* = 0.985), as did the *interaction between patient race and participant race* (difference score: *F*[1, 166] = 2.23, *p* = 0.137; categorical relative score: *F*[1, 166] = 1.26, *p* = 0.264).

No *interactions between participant sex and vignette patient race* were detected (difference score: *F*[1, 166] = 1.03, *p* = 0.311; categorical relative score: *F*[1, 166] = 0.304, *p* = 0.582). However, a *main effect of participant sex* did emerge (difference score: *F*[1, 165]= 3.91, *p* = 0.050; categorical relative score: *F*[1, 166] = 3.86, *p* = 0.051). Separate repeated measures ANOVAs with only sex as a between-subjects variable showed that relative to men (difference score: *M* = -0.17, *SE* = 0.10; categorical relative score: *M* = -0.05, *SE* = 0.04), women perceived patients to be in more pain (difference score: *M* = 0.10, *SE* = 0.06, *F*[1, 167] = 5.26, *p* = 0.023; categorical relative score: *M* = 0.06, *SE* = 0.03, *F*[1, 167] = 5.39, *p* = 0.021).

***Treatment Seeking.*** The main effect of participant race on pain needed before seeking treatment remained significant when participant sex was included as a covariate, *F*(1, 165) = 5.29, *p* = 0.023. There was no main effect of participant sex, *F*(1, 165) = 0.67, *p* = 0.415, and no interaction between participant race and sex, *F*(1, 165) = 0.08, *p* = 0.783. These effects were consistent across sexes. Follow-up independent samples t-tests within-sex revealed marginally significant differences reflecting the same pattern between Latinx-American women (*M* = 7.14, *SE* = 0.22) and White-American women (*M* = 6.57, *SE* = 0.23), *t*(117) = 1.76, *p* = 0.081, and between Latinx-American men (*M* = 7.44, *SE* = 0.29) and White-American men (M = 6.72, SE = 0.22), *t*(48) = 2.00, *p* = 0.051.

Association between Treatment Seeking and Pain Perception

There was no relationship between treatment seeking and pain perception (difference score: *r* = -.01, *p* = .929; categorical relative score: *r* < .01, *p* = .998) in the current sample.

Reaction Time

In addition to differences in pain ratings, we were also interested in exploring potential differences in reaction time (time participants spent on the vignettes) as a function of patient or participant race, since reaction time may serve as a proxy for participants’ motivation to engage with the vignettes. We computed average time spent across the Latinx-American and White-American vignettes separately.

*Reaction Time Results*

There were no significant main effects or interactions between participant and vignette patient race on reaction times. However, there was a non-significant pattern of Latinx-American participants spending more time on the vignettes overall (*M* = 3745.74 ms, *SE* = 203.60), relative to White-American participants (*M* = 3361.29 ms, *SE* = 202.40; *F*[1, 167] = 1.79, *p* = 0.182, Supplementary Figure 1). Among Latinx-American participants, average overall reaction time was correlated with pain difference scores, *r*(82) = 0.22, *p* = 0.046, such that the more time they spent on the vignettes, the more pain they ascribed to the patients. However, there was no correlation among White-American participants, *r*(83) = -0.11, *p* = 0.327. These correlations were significantly different from each other, *z* = 2.10, *p* = 0.036. However, this relationship was not present with pain perception coded as a categorical relative score for Latinx-Americans (*r*[82] = 0.16, *p =* 0.143) or White-Americans (*r*[83] = -0.07, *p* = 0.508), *z* = 1.50, *p* = 0.134.

Sampling

To ensure adequately powered and balanced sample sizes, recruitment remained open to Latinx-American participants longer than for White-American participants. This allowed us to gain a substantial sample of both White-American participants and Latinx-American participants. There were no significant differences between Latinx-American participants who participated before or after recruitment was closed to White participants.

*Supplementary Figure 1.* Group difference in reaction time. Error bars represent standard error of the mean (SEM) for each cell.


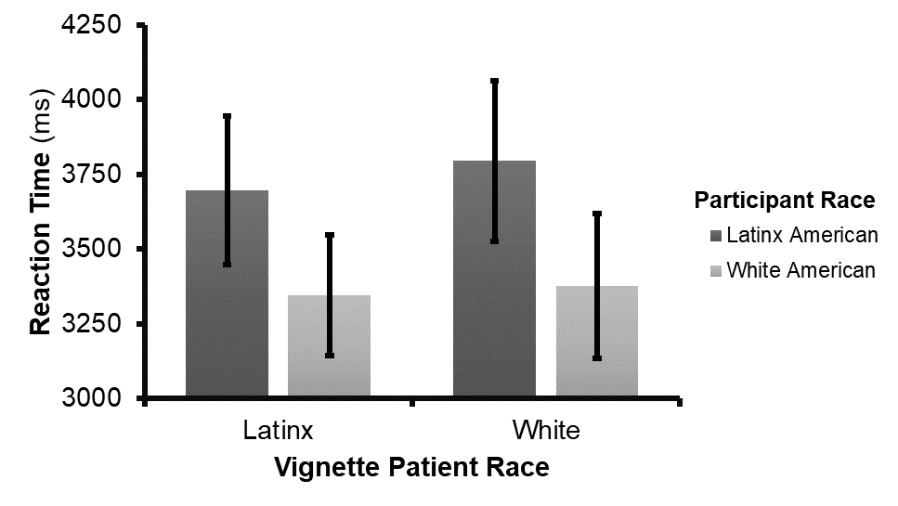

Supplement: Supplementary file 1 [file get_supplementary_file.php]
